# Supplementary material for: Real world evidence: experience and lessons from China
Source: PubMed Central journal article supplement — BMJ. 2018 Feb 5;360:j5262. doi: 10.1136/bmj.j5262 (PMC5797980; doi:10.1136/bmj.j5262), 2018-02-05
Supplement: sunx39868.ww1.pdf [file sunx39868.ww1.pdf]

## Appendix 1 Peer-reviewed publications from Chinese registries

We searched PubMed to identify studies conducted in mainland China that were explicitly labelled as registry study, published as a full-text article either in English or Chinese. The following search strategy was used in the PubMed database:

**((China[Title/Abstract]) OR Chinese[Title/Abstract]) AND registr\*[Title/Abstract]**  
Filters: **Humans**

Our search yielded 2604 reports, of which 338 were eligible after title and abstract screening, among some uncertain literatures reviewed by full texts.

| Disease category        | Number of publications | Examples of registries                                                                                                                                                                                                                                                                                                                                                    |
|-------------------------|------------------------|---------------------------------------------------------------------------------------------------------------------------------------------------------------------------------------------------------------------------------------------------------------------------------------------------------------------------------------------------------------------------|
| Cancer                  | 115                    | National Central Cancer Registry (NCCR) <sup>1 2</sup><br>A population-based cancer registry <sup>3 4</sup><br>Shanghai Cancer Registry <sup>5-7</sup>                                                                                                                                                                                                                    |
| Cerebrovascular disease | 85                     | China National Stroke Registry (CNSR) <sup>8-13</sup><br>ChinaQUEST (Quality Evaluation of Stroke Care and Treatment) Registry <sup>14-16</sup><br>China Interventional Stroke Registry (CISR) <sup>17</sup><br>Nanjing Stroke Registry <sup>18-20</sup><br>Chengdu Stroke Registry <sup>21 22</sup>                                                                      |
| Cardiovascular disease  | 53                     | Chinese Atrial Fibrillation Registry (CAFR) <sup>23 24</sup><br>Chinese Coronary Artery Bypass Grafting Registry<br>Chinese registry of acute coronary events (CRACE) <sup>25 26</sup><br>Chinese Cardiac Surgery Registry <sup>27</sup><br>CREATE (Multi-Center Registry of EXCEL Biodegradable Polymer Drug Eluting Stents) study<br>China-OASIS Registry <sup>28</sup> |
| Twins                   | 30                     | Chinese National Twin Registry (CNTR) <sup>29-31</sup><br>Twin Registry in Southwestern China (TRiSC) <sup>32</sup><br>Guangzhou Twin Registry <sup>33 34</sup>                                                                                                                                                                                                           |
| Organ transplantation   | 24                     | China Liver Transplant Registry (CLTR) <sup>35 36</sup><br>China Bone Marrow Transplantation Registry <sup>37</sup><br>Chinese Scientific Registry of Kidney Transplantation (CSRKT) <sup>38</sup>                                                                                                                                                                        |
| Birth defect            | 9                      | Chinese Birth Defects <sup>39 40</sup>                                                                                                                                                                                                                                                                                                                                    |
| Immune disease          | 8                      | Chinese SLE Treatment and Research group (CSTAR) registry <sup>41 42</sup>                                                                                                                                                                                                                                                                                                |
| Diabetes                | 5                      | Shanghai Diabetes Registry (SDR) <sup>43 44</sup><br>Chinese IDDM registry <sup>45</sup>                                                                                                                                                                                                                                                                                  |
| Others                  | 9                      | National registry of hemophilia <sup>46</sup><br>Chinese Alliance for Research in Thymomas (ChART) registry <sup>47</sup><br>Chinese maxillofacial trauma registry <sup>48</sup><br>Shanghai Dialysis Registry <sup>49</sup>                                                                                                                                              |

## References

1. Zheng ZX, Zheng RS, Zhang SW, et al. Colorectal cancer incidence and mortality in China, 2010. *Asian Pac J Cancer Prev* 2014;15(19):8455-60.
2. Chen W, Zheng R, Zhang S, et al. The incidences and mortalities of major cancers in China, 2009. *Chin J Cancer* 2013;32(3):106-12. doi: 10.5732/cjc.013.10018.
3. Chen JG, Zhu J, Parkin DM, et al. Trends in the incidence of cancer in Qidong, China, 1978-2002. *Int J Cancer* 2006;119(6):1447-54. doi: 10.1002/ijc.21952.
4. He YT, Hou J, Chen ZF, et al. Decrease in the esophageal cancer incidence rate in mountainous but not level parts of Cixian County, China, over 29 years. *Asian Pac J Cancer Prev* 2005;6(4):510-4.
5. Gao YT, McLaughlin JK, Blot WJ, et al. Reduced risk of esophageal cancer associated with green tea consumption. *J Natl Cancer Inst* 1994;86(11):855-8.
6. Xu WH, Zheng W, Xiang YB, et al. Soya food intake and risk of endometrial cancer among Chinese women in Shanghai: population based case-control study. *BMJ* 2004;328(7451):1285. doi: 10.1136/bmj.38093.646215.AE.
7. Yang Y, Xie L, Zheng JL, et al. Incidence trends of urinary bladder and kidney cancers in urban Shanghai, 1973-2005. *PLoS One* 2013;8(12):e82430. doi: 10.1371/journal.pone.0082430.
8. Wang Y, Liao X, Zhao X, et al. Using recombinant tissue plasminogen activator to treat acute ischemic stroke in China: analysis of the results from the Chinese National Stroke Registry (CNSR). *Stroke* 2011;42(6):1658-64. doi: 10.1161/strokeaha.110.604249.
9. Deng YX, Wang YL, Gao BQ, et al. Age differences in clinical characteristics, health care, and outcomes after ischemic stroke in China. *CNS Neurosci Ther* 2012;18(10):819-26. doi: 10.1111/j.1755-5949.2012.00378.x.
10. Ji R, Liu G, Shen H, et al. Persistence of secondary prevention medications after acute ischemic stroke or transient ischemic attack in Chinese population: data from China National Stroke Registry. *Neurol Res* 2013;35(1):29-36. doi: 10.1179/1743132812y.0000000107.
11. Wang Z, Li J, Wang C, et al. Gender differences in 1-year clinical characteristics and outcomes after stroke: results from the China National Stroke Registry. *PLoS One* 2013;8(2):e56459. doi: 10.1371/journal.pone.0056459.
12. Wang G, Liu G, Zhang R, et al. Evaluation of Off-Hour Emergency Care in Acute Ischemic Stroke: Results from the China National Stroke Registry. *PLoS One* 2015;10(9):e0138046. doi: 10.1371/journal.pone.0138046.
13. Wang H, Pan Y, Meng X, et al. Validation of the mSOAR and SOAR scores to predict early mortality in Chinese acute stroke patients. *PLoS One* 2017;12(7):e0180444. doi: 10.1371/journal.pone.0180444.
14. Wei JW, Heeley EL, Wang JG, et al. Comparison of recovery patterns and prognostic indicators for ischemic and hemorrhagic stroke in China: the ChinaQUEST (Quality Evaluation of Stroke Care and Treatment) Registry study. *Stroke* 2010;41(9):1877-83. doi: 10.1161/strokeaha.110.586909.
15. Delcourt C, Hackett M, Wu Y, et al. Determinants of quality of life after stroke in China: the ChinaQUEST (Quality Evaluation of Stroke care and Treatment) study. *Stroke* 2011;42(2):433-8. doi: 10.1161/strokeaha.110.596627.

16. Jin H, Zhu S, Wei JW, et al. Factors associated with prehospital delays in the presentation of acute stroke in urban China. *Stroke* 2012;43(2):362-70. doi: 10.1161/strokeaha.111.623512.
17. Gong DY, Liu XF, Huang FJ. Clinical feature analysis of fatal pulmonary thromboembolism: experiences from 41 autopsy-confirmed cases. *Eur Rev Med Pharmacol Sci* 2013;17(5):701-6.
18. Liu X, Xu G, Wu W, et al. Subtypes and one-year survival of first-ever stroke in Chinese patients: The Nanjing Stroke Registry. *Cerebrovasc Dis* 2006;22(2-3):130-6. doi: 10.1159/000093241.
19. Cao Q, Pei P, Zhang J, et al. Hypertension unawareness among Chinese patients with first-ever stroke. *BMC Public Health* 2016;16:170. doi: 10.1186/s12889-016-2835-1.
20. Cao Q, Zhou S, Cai B, et al. The impacts of premorbid hypertension treatment on functional outcomes of ischemic stroke. *J Neurol Sci* 2016;363:1-4. doi: 10.1016/j.jns.2016.02.020.
21. Liu J, Wang D, Xiong Y, et al. Association of Elevated High Sensitivity Cardiac Troponin T(hs-cTnT) Levels with Hemorrhagic Transformation and 3-Month Mortality in Acute Ischemic Stroke Patients with Rheumatic Heart Disease in China. *PLoS One* 2016;11(2):e0148444. doi: 10.1371/journal.pone.0148444.
22. Wang Q, Lin S, Dong W, et al. Characteristics of etiological diagnostic workup across the past 10 years in patients with spontaneous intracerebral hemorrhage in a large general hospital. *Dev Neurorehabil* 2016;19(1):10-6. doi: 10.3109/17518423.2013.878405.
23. Chang SS, Dong JZ, Ma CS, et al. Current Status and Time Trends of Oral Anticoagulation Use Among Chinese Patients With Nonvalvular Atrial Fibrillation: The Chinese Atrial Fibrillation Registry Study. *Stroke* 2016;47(7):1803-10. doi: 10.1161/strokeaha.116.012988.
24. Xia SJ, Du X, Li C, et al. Uptake of evidence-based statin therapy among atrial fibrillation patients in China: A report from the CAFR (Chinese Atrial Fibrillation Registry) Study. *Int J Cardiol* 2016;220:284-9. doi: 10.1016/j.ijcard.2016.06.113.
25. Song XT, Chen YD, Pan WQ, et al. Gender based differences in patients with acute coronary syndrome: findings from Chinese Registry of Acute Coronary Events (CRACE). *Chin Med J (Engl)* 2007;120(12):1063-7.
26. Lin Y, Pan W, Ning S, et al. Prevalence and management of hypertension in patients with acute coronary syndrome vary with gender: Observations from the Chinese registry of acute coronary events (CRACE). *Mol Med Rep* 2013;8(1):173-7. doi: 10.3892/mmr.2013.1461.
27. Hu S, Zheng Z, Yuan X, et al. Coronary artery bypass graft: contemporary heart surgery center performance in China. *Circ Cardiovasc Qual Outcomes* 2012;5(2):214-21. doi: 10.1161/circoutcomes.111.962365.
28. Han Y, Jing Q, Li Y, et al. Sustained clinical safety and efficacy of a biodegradable-polymer coated sirolimus-eluting stent in "real-world" practice: three-year outcomes of the CREATE (Multi-Center Registry of EXCEL Biodegradable Polymer Drug Eluting Stents) study. *Catheter Cardiovasc Interv* 2012;79(2):211-6. doi: 10.1002/ccd.23113.
29. Gao HN, Lu HZ, Cao B, et al. Clinical findings in 111 cases of influenza A (H7N9) virus infection. *N Engl J Med* 2013;368(24):2277-85. doi: 10.1056/NEJMoa1305584.

30. Liao C, Gao W, Cao W, et al. Associations of Body Composition Measurements with Serum Lipid, Glucose and Insulin Profile: A Chinese Twin Study. *PLoS One* 2015;10(11):e0140595. doi: 10.1371/journal.pone.0140595.
31. Wang B, Gao W, Lv J, et al. Physical activity attenuates genetic effects on BMI: Results from a study of Chinese adult twins. *Obesity (Silver Spring)* 2016;24(3):750-6. doi: 10.1002/oby.21402.
32. Huang Y, Collier D, Li T. A Prospective Twin Registry in Southwestern China (TRiSC): exploring the effects of genetic and environmental factors on cognitive and behavioral development and mental health wellbeing in children and adolescents. *Twin Res Hum Genet* 2009;12(3):312-9. doi: 10.1375/twin.12.3.312.
33. He M, Ge J, Wang D, et al. Heritability of the iridotrabecular angle width measured by optical coherence tomography in Chinese children: the Guangzhou twin eye study. *Invest Ophthalmol Vis Sci* 2008;49(4):1356-61. doi: 10.1167/iovs.07-1397.
34. Shen P, Ding X, Zheng Y, et al. Contribution of genetic and environmental effects on lens thickness: the Guangzhou Twin Eye study. *Invest Ophthalmol Vis Sci* 2012;53(4):1758-63. doi: 10.1167/iovs.11-9318.
35. Lu TF, Hua XW, Cui XL, et al. Liver transplantation for hepatocellular carcinoma: recent advances in China. *J Dig Dis* 2014;15(2):51-3.
36. Xu X, Lu D, Ling Q, et al. Liver transplantation for hepatocellular carcinoma beyond the Milan criteria. *Gut* 2016;65(6):1035-41. doi: 10.1136/gutjnl-2014-308513.
37. Lu D. [Current status of hematopoietic stem cell transplantation in China: an analysis of results registered at China Bone Marrow Transplantation Registry in 1998]. *Zhonghua Xue Ye Xue Za Zhi* 2000;21(2):87-9. [in Chinese]
38. Liu L, Zhang H, Fu Q, et al. Current status of pediatric kidney transplantation in China: data analysis of Chinese Scientific Registry of Kidney Transplantation. *Chin Med J (Engl)* 2014;127(3):506-10.
39. Dai L, Zhu J, Mao M, et al. Time trends in oral clefts in Chinese newborns: data from the Chinese National Birth Defects Monitoring Network. *Birth Defects Res A Clin Mol Teratol* 2010;88(1):41-7. doi: 10.1002/bdra.20607.
40. Gao Q, Liu YB, Zhong CJ, et al. [Clinical analysis of 137 patients with visceral leishmaniasis]. *Zhongguo Ji Sheng Chong Xue Yu Ji Sheng Chong Bing Za Zhi* 2013;31(2):135-7. [in Chinese]
41. Li M, Zhang W, Leng X, et al. Chinese SLE Treatment and Research group (CSTAR) registry: I. Major clinical characteristics of Chinese patients with systemic lupus erythematosus. *Lupus* 2013;22(11):1192-9. doi: 10.1177/0961203313499086.
42. Zhao J, Bai W, Zhu P, et al. Chinese SLE Treatment and Research group (CSTAR) registry VII: prevalence and clinical significance of serositis in Chinese patients with systemic lupus erythematosus. *Lupus* 2016;25(6):652-7. doi: 10.1177/0961203315625460.
43. Gu Y, Wang C, Zheng Y, et al. Cancer incidence and mortality in patients with type 2 diabetes treated with human insulin: a cohort study in Shanghai. *PLoS One* 2013;8(1):e53411. doi: 10.1371/journal.pone.0053411.
44. Lu J, Hou X, Zhang L, et al. Association between body mass index and diabetic retinopathy in Chinese patients with type 2 diabetes. *Acta Diabetol* 2015;52(4):701-8. doi: 10.1007/s00592-014-0711-y.

45. Yang Z, Wang K, Li T, et al. Childhood diabetes in China. Enormous variation by place and ethnic group. *Diabetes Care* 1998;21(4):525-9.
46. Zhao H, Yang L, Long C, et al. Hemophilia care in China: review of care for 417 hemophilia patients from 11 treatment centers in Shanxi Province. *Expert Rev Hematol* 2015;8(4):543-50. doi: 10.1586/17474086.2015.1043263.
47. Wang F, Pang L, Fu J, et al. [Postoperative Survival for Patients with Thymoma Complicating Myasthenia Gravis- Preliminary Retrospective Results of the ChART Database]. *Zhongguo Fei Ai Za Zhi* 2016;19(7):418-24. doi: 10.3779/j.issn.1009-3419.2016.07.03. [in Chinese]
48. Zhaohui S, Shuxia Z, Xinghua F, et al. The design and implementation of chinese maxillofacial trauma registry, analysis and injury severity score system. *J Trauma* 2008;64(4):1024-33. doi: 10.1097/TA.0b013e31809fea9b.
49. Yao Q, Zhang W, Qian J. Dialysis status in China: a report from the Shanghai Dialysis Registry (2000-2005). *Ethn Dis* 2009;19(1 Suppl 1):S1-23-6.
