# Supplementary material for: Real world evidence: experience and lessons from China
Source: PubMed Central journal article supplement — BMJ. 2018 Feb 5;360:j5262. doi: 10.1136/bmj.j5262 (PMC5797980; doi:10.1136/bmj.j5262), 2018-02-05
Supplement: sunx39868.ww2.pdf [file sunx39868.ww2.pdf]

## Appendix 2 Peer-reviewed publications from administrative databases in China

We searched PubMed to identify studies conducted in mainland China. The eligibility criteria of studies were: 1) explicitly labelled as administrative database studies; 2) published as a full-text article either in English or Chinese; 3) database was available prior to the conduct of study; 4) all the data used for the study were primarily from database; and 5) exclusively included Chinese population.

The following search strategy was used in the PubMed database:

Search (((((((new rural cooperative medical system[Title/Abstract]) OR new rural cooperative medical scheme[Title/Abstract])) OR health insurance[Title/Abstract]) OR medical insurance[Title/Abstract]) OR (((((((clinical information system\*[Title/Abstract]) OR patient care information[Title/Abstract]) OR hospital information system\*[Title/Abstract]) OR HIS[Title/Abstract]) OR laboratory information management system\*[Title/Abstract]) OR LIS[Title/Abstract]) OR (picture archiving[Title/Abstract] AND communication system\*[Title/Abstract])) OR PACS[Title/Abstract])) OR (((((((medical record\*[Title/Abstract]) OR medical chart\*[Title/Abstract]) OR medical claim\*[Title/Abstract]) OR prescription claim\*[Title/Abstract]) OR administrative claim\*[Title/Abstract]) OR electronic medical record\*[Title/Abstract]) OR EMR[Title/Abstract]))) AND ((China[Title/Abstract]) OR Chinese[Title/Abstract]) Filters: Humans

Our search yielded 3,572 reports, of which 523 were eligible after title and abstract screening.

**Table 1: Published papers on retrospective databases by data sources**

| Data source                     | Number of publications | Examples of studies                                                                                                                                                                                         |
|---------------------------------|------------------------|-------------------------------------------------------------------------------------------------------------------------------------------------------------------------------------------------------------|
| Medical chart review            | 456                    | Lung cancer in Dachang Tin Mine <sup>1</sup><br>Death and injuries in earthquake <sup>2 3</sup><br>111 patients with laboratory-confirmed avian-origin influenza A (H7N9) infection <sup>4</sup>            |
| Electronic medical record (EMR) | 39                     | The phenotype and clinical patterns of Crohn's disease <sup>5</sup><br>adverse drug reactions (ADRs) in 20 hospitals <sup>6</sup><br>acute myocardial infarction (AMI) in 14 Chinese hospitals <sup>7</sup> |
| Medical claims/insurance        | 25                     | New Cooperative Medical Scheme (NCMS) <sup>8</sup><br>Urban Employee Basic Medical Insurance (UEBMI) <sup>9</sup>                                                                                           |
| Others                          | 3                      | Beijing Emergency Medical Service System (EMSS) <sup>10</sup><br>Infectious Disease Reporting System of the Center of Diseases Control <sup>11</sup>                                                        |

**Table 2: Published papers on retrospective databases by disease areas**

| Areas of research                           | Number of publications | Examples of studies                                                                                        |
|---------------------------------------------|------------------------|------------------------------------------------------------------------------------------------------------|
| Cancer                                      | 102                    | Breast cancer <sup>12</sup> ; Renal tumors <sup>13</sup>                                                   |
| Cardiovascular and cerebrovascular diseases | 57                     | Atrial fibrillation <sup>14</sup> ; Heart failure <sup>15</sup>                                            |
| Infectious diseases                         | 38                     | Chronic hepatitis B <sup>16</sup> ; HIV infection <sup>17</sup>                                            |
| Ophthalmology                               | 37                     | Blindness <sup>18</sup> ; Late traumatic flap <sup>19</sup>                                                |
| Digestive disease                           | 37                     | Pancreatic duct stone <sup>20</sup> ; Liver cirrhosis <sup>21</sup>                                        |
| Respiratory disease                         | 33                     | H1N1 virus infection <sup>22</sup> ; Community-acquired pneumonia <sup>23</sup>                            |
| Obstetric and gynecological disorders       | 30                     | Cesarean section <sup>24</sup> ; Gestational diabetes mellitus <sup>25</sup>                               |
| Mental and neurological diseases            | 22                     | Parkinson's syndrome <sup>26</sup> ; Use of psychotropic drugs <sup>27</sup>                               |
| Orthopedics                                 | 22                     | Hip fracture <sup>28</sup> ; Acute spinal fractures <sup>29</sup>                                          |
| Injuries                                    | 18                     | Maxillofacial fractures <sup>30</sup> ; Crush syndrome <sup>31</sup>                                       |
| Adverse drugs events                        | 12                     | Severe cutaneous adverse drug reactions <sup>32</sup> ; Administered Dengzhan Xixin <sup>33</sup>          |
| Renal and urogenital disorder               | 12                     | End-stage renal disease <sup>34</sup> ; Acute renal failure <sup>35</sup>                                  |
| Health policies and evaluation              | 11                     | New Rural Cooperative Medical Scheme <sup>36</sup><br>Urban Resident Basic Medical Insurance <sup>37</sup> |
| Dermatosis                                  | 10                     | Systemic lupus erythematosus <sup>38</sup> Port wine stains <sup>39</sup>                                  |
| Endocrine disease                           | 10                     | Diabetes <sup>40</sup> ; Nonmedullary thyroid carcinoma <sup>41</sup>                                      |
| Medical interventions                       | 10                     | Dialysis <sup>42</sup> ; Perioperative prophylactic use of antimicrobial agents <sup>43</sup>              |
| Others                                      | 62                     | Orphan diseases <sup>44 45</sup> ; Parasitic disease <sup>46 47</sup> ; Death <sup>48 49</sup>             |

## References

1. Fu H, Gu X, Jin X, et al. Lung cancer among tin miners in southeast China: silica exposure, silicosis, and cigarette smoking. *Am J Ind Med* 1994;26(3):373-81.
2. Wen J, Shi YK, Li YP, et al. Risk factors of earthquake inpatient death: a case control study. *Crit Care* 2009;13(1):R24. doi: 10.1186/cc7729.
3. Chen R, Song Y, Kong Q, et al. Analysis of 78 patients with spinal injuries in the 2008 Sichuan, China, earthquake. *Orthopedics* 2009;32(5):322.
4. Gao HN, Lu HZ, Cao B, et al. Clinical findings in 111 cases of influenza A (H7N9) virus infection. *N Engl J Med* 2013;368(24):2277-85. doi: 10.1056/NEJMoa1305584.
5. Wu X, Lu XH. [The phenotype and clinical patterns of Crohn's disease in the Chinese]. *Zhonghua Nei Ke Za Zhi* 2006;45(8):661-3. [in Chinese]
6. Liao X, Chang YP, Xie YM, et al. [Analysis of questionable allergic factors to parenterally administered salvianolate--a nested case control study using hospital information system data]. *Zhongguo Zhong Yao Za Zhi* 2014;39(18):3576-80. [in Chinese]
7. Hu J, Xie Y, Shu Z, et al. Trends in the use of guideline-recommended medications and in-hospital mortality of patients with acute myocardial infarction in a Chinese population. *PLoS One* 2015;10(2):e0118777. doi: 10.1371/journal.pone.0118777.
8. Xiang L, Pan Y, Hou S, et al. The impact of the new cooperative medical scheme on financial burden of tuberculosis patients: evidence from six counties in China. *Infect Dis Poverty* 2016;5:8. doi: 10.1186/s40249-015-0094-5.
9. Han YC, Huang HM, Sun L, et al. Epidemiological Study of RRT-Treated ESRD in Nanjing - A Ten-Year Experience in Nearly Three Million Insurance Covered Population. *PLoS One* 2016;11(2):e0149038. doi: 10.1371/journal.pone.0149038.
10. Du T, Lewin MR, Wang H, et al. Circadian and seasonal rhythms of acute upper gastrointestinal bleeding in Beijing. *Emerg Med J* 2010;27(7):504-7. doi: 10.1136/emj.2009.075820.
11. Jia N, Feng D, Fang LQ, et al. Case fatality of SARS in mainland China and associated risk factors. *Trop Med Int Health* 2009;14 Suppl 1:21-7. doi: 10.1111/j.1365-3156.2008.02147.x.
12. Wang Q, Li J, Zheng S, et al. Breast cancer stage at diagnosis and area-based socioeconomic status: a multicenter 10-year retrospective clinical epidemiological study in China. *BMC Cancer* 2012;12:122. doi: 10.1186/1471-2407-12-122.
13. Cai J, Pan C, Lu Q, et al. Childhood renal tumor: a report from a Chinese Children's Cancer Group. *Biomed Res Int* 2014;2014:894341. doi: 10.1155/2014/894341.
14. Sun Y, Hu D, Li K, et al. Predictors of stroke risk in native Chinese with nonrheumatic atrial fibrillation: retrospective investigation of hospitalized patients. *Clin Cardiol* 2009;32(2):76-81. doi: 10.1002/clc.20232.
15. Wang N, Zhao D, Liu J, et al. Impact of heart failure on in-hospital outcomes of acute coronary syndrome patients in China - results from the Bridging the Gap on CHD Secondary Prevention in China (BRIG) project. *Int J Cardiol* 2012;160(1):15-9. doi: 10.1016/j.ijcard.2011.03.010.
16. Xu B, Hu DC, Rosenberg DM, et al. Chronic hepatitis B: a long-term retrospective cohort study of disease progression in Shanghai, China. *J Gastroenterol Hepatol* 2003;18(12):1345-52.

17. Fan HW, Guo FP, Li YJ, et al. Prevalence of thrombocytopenia among Chinese adult antiretroviral-naive HIV-positive patients. *Chin Med J (Engl)* 2015;128(4):459-64. doi: 10.4103/0366-6999.151078.
18. Chen X, Chen C, Zhang Y, et al. The effect of health insurance reform on the number of cataract surgeries in Chongqing, China. *BMC Health Serv Res* 2011;11:67. doi: 10.1186/1472-6963-11-67.
19. Xiao J, Jiang C, Zhang M, et al. When case report became case series: 45 cases of late traumatic flap complications after laser-assisted in situ keratomileusis and review of Chinese literature. *Br J Ophthalmol* 2014;98(9):1282-6. doi: 10.1136/bjophthalmol-2013-304422.
20. Li JS, Zhang ZD, Tang Y, et al. Retrospective analysis of 88 patients with pancreatic duct stone. *Hepatobiliary Pancreat Dis Int* 2007;6(2):208-12.
21. Xiong J, Wang J, Huang J, et al. Non-alcoholic steatohepatitis-related liver cirrhosis is increasing in China: a ten-year retrospective study. *Clinics (Sao Paulo)* 2015;70(8):563-8. doi: 10.6061/clinics/2015(08)06.
22. Deng LH, Zeng YL, Feng P, et al. Clinical characteristics of critical patients with pandemic influenza A (H1N1) virus infection in Chengdu, China. *J Zhejiang Univ Sci B* 2012;13(1):49-55. doi: 10.1631/jzus.B1100168.
23. Wang XF, Liu JP, Shen KL, et al. A cross-sectional study of the clinical characteristics of hospitalized children with community-acquired pneumonia in eight eastern cities in China. *BMC Complement Altern Med* 2013;13:367. doi: 10.1186/1472-6882-13-367.
24. Wu WL. Cesarean delivery in Shantou, China: a retrospective analysis of 1922 women. *Birth* 2000;27(2):86-90.
25. Zhu WW, Yang HX, Wei YM, et al. Evaluation of the value of fasting plasma glucose in the first prenatal visit to diagnose gestational diabetes mellitus in china. *Diabetes Care* 2013;36(3):586-90. doi: 10.2337/dc12-1157.
26. Liu H, Xie YM, Yi DH, et al. [Clinical and medicine characteristics of patients with Parkinson's syndrome]. *Zhongguo Zhong Yao Za Zhi* 2014;39(18):3493-8. [in Chinese]
27. Song QY, Guo LT. Trends in the prescribing of psychotropic medications for inpatient children and adolescents, 2000-2010: a study from China. *Int Clin Psychopharmacol* 2013;28(4):193-9. doi: 10.1097/YIC.0b013e32836140d6.
28. Yan L, Zhou B, Prentice A, et al. Epidemiological study of hip fracture in Shenyang, People's Republic of China. *Bone* 1999;24(2):151-5.
29. Tian Y, Zhu Y, Yin B, et al. Age- and gender-specific clinical characteristics of acute adult spine fractures in China. *Int Orthop* 2016;40(2):347-53. doi: 10.1007/s00264-015-3025-y.
30. Tang YL, Zhu GQ, Zhou H, et al. Analysis of 46 maxillofacial fracture victims in the 2008 Wenchuan, China earthquake. *Oral Surg Oral Med Oral Pathol Oral Radiol Endod* 2009;108(5):673-8. doi: 10.1016/j.tripleo.2009.05.031.
31. Chunguang Z, Rigao C, Fuguo H, et al. Characteristics of crush syndrome caused by prolonged limb compression longer than 24 h in the Sichuan earthquake. *Emerg Med J* 2010;27(8):627-30. doi: 10.1136/emj.2008.070961.
32. Li LF, Ma C. Epidemiological study of severe cutaneous adverse drug reactions in a city district of China. *Clin Exp Dermatol* 2006;31(5):642-7. doi: 10.1111/j.1365-

2230.2006.02185.x.

33. Yang W, Cheng H, Xie YM, et al. [Nested case control study to analyze suspected cases and their related factors of allergic reactions to parenterally administered dengzhan xixin]. *Zhongguo Zhong Yao Za Zhi* 2013;38(18):3024-7. [in Chinese]
34. Long HB, Zhang J, Zhou WD, et al. [A retrospective analysis of the six-year data of peritoneal dialysis in a single center]. *Nan Fang Yi Ke Da Xue Xue Bao* 2010;30(6):1395-7. [in Chinese]
35. Hu Z, Zeng X, Fu P, et al. Predictive factors for acute renal failure in crush injuries in the Sichuan earthquake. *Injury* 2012;43(5):613-8. doi: 10.1016/j.injury.2010.08.025.
36. Wang J, Zhou HW, Lei YX, et al. Financial protection under the new rural cooperative medical schemes in China. *Med Care* 2012;50(8):700-4. doi: 10.1097/MLR.0b013e318249d8bf.
37. Gao C, Xu F, Liu GG. Payment reform and changes in health care in China. *Soc Sci Med* 2014;111:10-6. doi: 10.1016/j.socscimed.2014.03.035.
38. Feng X, Zou Y, Pan W, et al. Associations of clinical features and prognosis with age at disease onset in patients with systemic lupus erythematosus. *Lupus* 2014;23(3):327-34. doi: 10.1177/0961203313513508.
39. Yuan KH, Li Q, Yu WL, et al. Comparison of photodynamic therapy and pulsed dye laser in patients with port wine stain birthmarks: a retrospective analysis. *Photodiagnosis Photodyn Ther* 2008;5(1):50-7. doi: 10.1016/j.pdpdt.2007.12.001.
40. Fu JF, Liang L, Gong CX, et al. Status and trends of diabetes in Chinese children: analysis of data from 14 medical centers. *World J Pediatr* 2013;9(2):127-34. doi: 10.1007/s12519-013-0414-4.
41. Xue Y, Ye ZQ, Zhou HW, et al. Serum Calcium and Risk of Nonmedullary Thyroid Cancer in Patients with Primary Hyperparathyroidism. *Med Sci Monit* 2016;22:4482-89.
42. Zhou QG, Jiang JP, Wu SJ, et al. Current pattern of Chinese dialysis units: a cohort study in a representative sample of units. *Chin Med J (Engl)* 2012;125(19):3434-9.
43. He SP, Li ZL, Yan Q. [Survey of the perioperative prophylactic use of antimicrobial agents in 118 hospitals in China]. *Zhonghua Wai Ke Za Zhi* 2008;46(1):12-4. [in Chinese]
44. Chen PD, Yu SL, Chen S, et al. Retrospective study of 61 patients with adult-onset Still's disease admitted with fever of unknown origin in China. *Clin Rheumatol* 2012;31(1):175-81. doi: 10.1007/s10067-011-1798-y.
45. Lin LJ, Wang DX, Ding NN, et al. Comprehensive analysis on clinical features of Wilson's disease: an experience over 28 years with 133 cases. *Neurol Res* 2014;36(2):157-63. doi: 10.1179/1743132813y.0000000262.
46. Zhou HX, Chai SX, Craig PS, et al. Epidemiology of alveolar echinococcosis in Xinjiang Uygur autonomous region, China: a preliminary analysis. *Ann Trop Med Parasitol* 2000;94(7):715-29.
47. Qiu DC, Hubbard AE, Zhong B, et al. A matched, case-control study of the association between *Schistosoma japonicum* and liver and colon cancers, in rural China. *Ann Trop Med Parasitol* 2005;99(1):47-52. doi: 10.1179/136485905x19883.
48. Rao C, Yang G, Hu J, et al. Validation of cause-of-death statistics in urban China. *Int J Epidemiol* 2007;36(3):642-51. doi: 10.1093/ije/dym003.
49. Yang C, Wang HY, Zhong HJ, et al. The epidemiological analyses of trauma patients in

Chongqing teaching hospitals following the Wenchuan earthquake. *Injury* 2009;40(5):488-92. doi: 10.1016/j.injury.2009.01.102.
